# Supplementary material for: Gut Microbiota in Children Hospitalized with Oedematous and Non-Oedematous Severe Acute Malnutrition in Uganda
Source: PLoS Negl Trop Dis. 2016 Jan 15;10(1):e0004369. doi: 10.1371/journal.pntd.0004369 (PMC4714756; doi:10.1371/journal.pntd.0004369)
Supplement: S2 Table — Children with oedematous vs non-oedematous SAM. (XLSX) [file pntd.0004369.s004.xlsx]

## Sheet: Ark 1
	S2 Table. Bacterial distribution, abundance and G-test of independence. Children with oedematous vs non-oedematous SAM.
	Phylum	Class	Order	Family	Genera	Mean relative abundance % (oedema)	Mean relative abundance % (non-oedema)	p-value	Bonferroni corrected	FDR corrected	G prob	Bonferroni corrected	FDR corrected
	Bacteroidetes	Bacteroidia	Bacteroidales	Prevotellaceae	Prevotella	26	17	0.1488	5.9538	0.7442	0.6295	23.2932	1.2260
	Proteobacteria	Gammaproteobacteria	Enterobacteriales	Enterobacteriaceae	Enterobacteriaceae (unassigned)	25	41	0.0245	0.9781	0.4088	>0.95
	Bacteroidetes	Bacteroidia	Bacteroidales	Bacteroidaceae	Bacteroides	7	5	0.5027	20.1064	0.7447	0.8565	31.6908	1.0223
	Proteobacteria	Gammaproteobacteria	Aeromonadales	Succinivibrionaceae	Succinivibrio	7	3	0.3499	13.9993	0.7368	0.7215	26.6961	1.2712
	Firmicutes	Clostridia	Clostridiales	Veillonellaceae	Megasphaera	6	5	0.7891	31.5642	0.8306	0.8286	30.6575	1.0949
	Firmicutes	Clostridia	Clostridiales	Veillonellaceae	Veillonella	5	4	0.6515	26.0589	0.7664	0.7862	29.0879	1.1635
	Firmicutes	Clostridia	Clostridiales	Veillonellaceae	Megamonas	3	<1	0.1763	7.0524	0.6411	0.9152	33.8616	0.9675
	Firmicutes	Clostridia	Clostridiales	Ruminococcaceae	Faecalibacterium	3	2	0.2985	11.9409	0.7463	0.5193	19.2152	1.6013
	Fusobacteria	Fusobacteriia	Fusobacteriales	Fusobacteriaceae	Fusobacterium	2	<1	0.3419	13.8475	0.7693	0.8425	31.1735	1.0391
	Firmicutes	Clostridia	Clostridiales	Ruminococcaceae	Ruminococcaceae (unassigned)	2	2	0.5843	23.3721	0.7539	0.4456	16.4855	2.0607
	Firmicutes	Bacilli	Lactobacillales	Lactobacillaceae	Lactobacillus	1	4	0.0958	3.8324	0.5475	0.7710	28.5287	1.1887
	Bacteroidetes	Bacteroidia	Bacteroidales	Paraprevotellaceae	Paraprevotellaceae (unassigned)	1	1	0.7098	28.3935	0.8112	>0.95
	Proteobacteria	Gammaproteobacteria	Enterobacteriales	Enterobacteriaceae	Enterobacteriaceae (other)	1	3	0.0039	0.1594	0.1594	0.9168	33.9220	0.9423
	Proteobacteria	Epsilonproteobacteria	Campylobacterales	Campylobacteraceae	Campylobacter	1	1	0.6168	24.6733	0.7477	0.7601	28.1233	1.2228
	Proteobacteria	Betaproteobacteria	Burkholderiales	Alcaligenaceae	Sutterella	1	1	0.2717	10.8685	0.7246	0.4847	17.9327	1.6302
	Proteobacteria	Gammaproteobacteria	Enterobacteriales	Enterobacteriaceae	Proteus	1	<1	0.6067	24.2661	0.7583	0.8633	31.9438	0.9680
	Actinobacteria	Actinobacteria	Bifidobacteriales	Bifidobacteriaceae	Bifidobacterium	1	1	0.4656	18.6243	0.8098	0.9354	34.6106	0.9354
	Bacteroidetes	Bacteroidia	Bacteroidales	Porphyromonadaceae	Parabacteroides	<1	<1	0.1553	6.2136	0.6904	0.1688	6.2472	3.1236
	Firmicutes	Bacilli	Lactobacillales	Streptococcaceae	Streptococcus	<1	2	0.1731	6.9224	0.6922	0.9018	33.3657	0.9813
	Firmicutes	Clostridia	Clostridiales	Veillonellaceae	Dialister	<1	1	0.4897	19.5875	0.7534	0.5625	20.8110	1.3874
					Unassigned (other)	<1	<1	0.0570	2.2805	0.5701	>0.95
	Proteobacteria	Gammaproteobacteria	Enterobacteriales	Enterobacteriaceae	Klebsiella	<1	1	0.0898	3.5906	0.5906	0.8623	31.9054	0.9970
	Firmicutes	Clostridia	Clostridiales	Lachnospiraceae	Roseburia	<1	<1	0.5739	22.9592	0.7917	0.2060	7.6234	1.9059
	Firmicutes	Clostridia	Clostridiales	Lachnospiraceae	Ruminococcus	<1	<1	0.1974	7.8966	0.6581	0.2862	10.5890	1.7648
	Firmicutes	Bacilli	Lactobacillales	Enterococcaceae	Enterococcus	<1	<1	0.4868	19.4715	0.7789	0.5515	20.4047	1.5696
	Firmicutes	Clostridia	Clostridiales	Lachnospiraceae	Blautia	<1	<1	0.4859	19.4396	0.8099	0.2009	7.4328	2.4776
	Proteobacteria	Gammaproteobacteria	Pasteurellales	Pasteurellaceae	Haemophilus	<1	<1	0.8111	32.4458	0.8319	0.5934	21.9574	1.2199
	Firmicutes	Clostridia	Clostridiales	Lachnospiraceae	Coprococcus	<1	<1	0.5561	22.2436	0.7944	0.2252	8.3341	1.6668
	Firmicutes	Clostridia	Clostridiales	Lachnospiraceae	Dorea	<1	<1	0.2509	10.0384	0.7170	0.5534	20.4772	1.4627
	Firmicutes	Clostridia	Clostridiales	Ruminococcaceae	Oscillospira	<1	<1	0.2397	9.5862	0.7374	0.4745	17.5575	1.9508
	Firmicutes	Clostridia	Clostridiales	Lachnospiraceae	Lachnospira	<1	<1	0.8156	32.6235	0.8156	0.8130	30.0799	1.1141
	Proteobacteria	Gammaproteobacteria	Pseudomonadales	Moraxellaceae	Acinetobacter	<1	<1	0.3354	13.4145	0.7891	0.6658	24.6344	1.2317
	Proteobacteria	Gammaproteobacteria	Enterobacteriales	Enterobacteriaceae	Escherichia	<1	<1	0.0406	1.6240	0.5413	0.4785	17.7042	1.7704
	Proteobacteria	Gammaproteobacteria	Enterobacteriales	Enterobacteriaceae	Erwinia	<0.01	<1	0.6067	24.2661	0.7583	0.8353	30.9074	1.0658
